# Supplementary material for: Perceived Quality of Life Is Related to a Healthy Lifestyle and Related Outcomes in Spanish Children and Adolescents: The Physical Activity, Sedentarism, and Obesity in Spanish Study
Source: MDPI journal article supplement (doi:10.3390/nu15245125), 2023-12-16
Supplement: s1 [file s1]

**Table S1.** Sociodemographic characteristics of parents according to HRQoL of their children.

|                                                      | Low HRQoL §<br>(n=1775) | High HRQoL §<br>(n=1759) | p-Value ‡ |
|------------------------------------------------------|-------------------------|--------------------------|-----------|
| Parent Health Perception                             |                         |                          | <0.001    |
| Excellent (n; %)                                     | 86 (4.8)                | 152 (8.6)                |           |
| Very Good (n; %)                                     | 422 (23.8)              | 507 (28.8)               |           |
| Good (n; %)                                          | 976 (55.0)              | 840 (47.8)               |           |
| Poor (n; %)                                          | 151 (8.5)               | 117 (6.7)                |           |
| Bad (n; %)                                           | 10 (0.6)                | 7 (0.4)                  |           |
| Parent education level                               |                         |                          | 0.040     |
| University degree (n; %)                             | 465 (26.2)              | 511 (29.1)               |           |
| General Certificate of Education (n; %)              | 341 (19.2)              | 301 (17.1)               |           |
| Vocational Education and Training (n; %)             | 389 (21.9)              | 336 (19.1)               |           |
| General Certificate of Secondary Education (n; %)    | 233 (13.1)              | 220 (12.5)               |           |
| Primary Education (n; %)                             | 205 (11.5)              | 231 (13.1)               |           |
| No education (n; %)                                  | 19 (1.1)                | 27 (1.5)                 |           |
| Parent employment status                             |                         |                          | 0.311     |
| Working (n; %)                                       | 1266 (71.3)             | 1234 (70.2)              |           |
| Home working (n; %)                                  | 205 (11.5)              | 211 (12.0)               |           |
| Unemployment (n; %)                                  | 134 (7.5)               | 142 (8.1)                |           |
| Student (n; %)                                       | 13 (0.7)                | 16 (0.9)                 |           |
| Others (retirement+permanent disability) (n; %)      | 40 (2.3)                | 22 (1.3)                 |           |
| Parent smoking habit                                 |                         |                          | 0.111     |
| Yes (n; %)                                           | 435 (24.5)              | 366 (20.8)               |           |
| Former smoker (0 to +5 years) (n; %)                 | 428 (24.1)              | 424 (24.1)               |           |
| Never smoker (n; %)                                  | 791 (44.6)              | 837 (47.6)               |           |
| Parent BMI (WHO)                                     |                         |                          | 0.171     |
| Underweight (Severe, moderate, mild thinness) (n; %) | 34 (1.9)                | 42 (2.3)                 |           |
| Normal weight (n; %)                                 | 771 (43.4)              | 760 (43.2)               |           |
| Pre-obesity (n; %)                                   | 506 (28.5)              | 505 (28.7)               |           |
| Obesity class I (n; %)                               | 184 (10.4)              | 165 (9.4)                |           |
| Obesity class II (n; %)                              | 48 (2.7)                | 30 (1.7)                 |           |
| Obesity class III (n; %)                             | 12 (0.7)                | 6 (0.3)                  |           |

Abbreviations: BMI: Body Mass Index; HRQoL: Health-Related Quality of Life; SD: Standard deviation. § Grouping variable= ((HealthTODAY/100) + (EQ5D5Lindexvalue)). The cut-off percentiles were as follows: low HRQoL:  $\leq 1.8570$ ; high HRQoL:  $\geq 1.8571$ . ‡ Differences in prevalence's across groups were examined using  $\chi^2$
